# Supplementary material for: High precision Neisseria gonorrhoeae variant and antimicrobial resistance calling from metagenomic Nanopore sequencing
Source: HighWire-hosted journal article supplement (doi:10.1101/gr.262865.120), 2020-09-01
Supplement: Supplemental_Code.tar.zip [file penA_alleles_metadata.xlsx]

## Sheet: Sheet 1
Allele Type	AMR Markers	Collection Date	Originating Country	Patient Age	Patient Gender	Beta-Lactamase	Isolate Classification(s)	MICs Determined By	Azithromycin	Cefixime	Ceftriaxone	Ciprofloxacin	Erythromycin	Penicillin	Spectinomycin	Tetracycline	Additional Epidemiological Data	Curator Comments
1.001	penA Type I NonMosaic	2001-01-01	Canada		Male	Negative	Not Provided	Agar Dilution									Penis/Urethra
1.002	penA Type I NonMosaic				Unknown	Unknown	Not Provided	Not Provided										FA1090
1.003	penA Type I NonMosaic	2010-02-03	Canada	22	Female	Negative	Not Provided	Agar Dilution
1.004	penA Type I NonMosaic	2017-11-08	Unknown		Unknown	Unknown	Not Provided	Not Provided
1.005	penA Type I NonMosaic	2017-11-08	Unknown		Unknown	Unknown	Not Provided	Not Provided
1.006	penA Type I NonMosaic	2017-11-08	Unknown		Unknown	Unknown	Not Provided	Not Provided
1.007	penA Type I NonMosaic	2017-11-08	Unknown		Unknown	Unknown	Not Provided	Not Provided
1.008	penA Type I NonMosaic	2018-01-19	Sweden		Unknown	Unknown	Not Provided	Not Provided
1.009	penA Type I NonMosaic	2018-10-04	Sweden		Unknown	Unknown	Not Provided	Not Provided
1.01	penA Type I NonMosaic	2018-11-28	Sweden		Unknown	Unknown	Not Provided	Not Provided
1.011	penA Type I NonMosaic	2018-11-28	Sweden		Unknown	Unknown	Not Provided	Not Provided
2.001	penA Type II NonMosaic	1997-01-01	Thialand		Unknown	Negative	TRNG	Agar Dilution										WHO-G
2.002	penA Type II NonMosaic	2004-10-19	Canada	37	Male	Positive	CipR/EryR/PPNG/TRNG	Agar Dilution	≥ 512.0								Penis/Urethra
2.003	penA Type II NonMosaic	2010-07-28	Canada	53	Male	Negative	Not Provided	Agar Dilution									Penis/Urethra
2.004	penA Type II NonMosaic	2008-04-15	Netherlands	42	Male	Unknown	Not Provided	Agar Dilution									Rectal
2.005	penA Type II NonMosaic	2011-10-20	Netherlands	30	Male	Unknown	Not Provided	E-Test									Urethra
2.006	penA Type II NonMosaic	2011-10-27	Netherlands	19	Female	Unknown	Not Provided	Agar Dilution									Cervix
2.007	penA Type II NonMosaic	2017-10-26			Unknown	Unknown	Not Provided	Not Provided
2.008	penA Type II NonMosaic	2017-11-03	Unknown		Unknown	Unknown	Not Provided	Not Provided
2.009	penA Type II NonMosaic	2017-11-06	Unknown		Unknown	Unknown	Not Provided	Not Provided
2.01	penA Type II NonMosaic	2017-11-06			Unknown	Unknown	Not Provided	Not Provided
2.011	penA Type II NonMosaic	2017-11-06			Unknown	Unknown	Not Provided	Not Provided
2.012	penA Type II NonMosaic	2017-11-08	Unknown		Unknown	Unknown	Not Provided	Not Provided
2.013	penA Type II NonMosaic	2017-11-08	Unknown		Unknown	Unknown	Not Provided	Not Provided
2.014	penA Type II NonMosaic	2017-11-08	Unknown		Unknown	Unknown	Not Provided	Not Provided
2.015	penA Type II NonMosaic	2018-01-18	Sweden		Unknown	Unknown	Not Provided	Not Provided
2.016	penA Type II NonMosaic	2018-01-19	Sweden		Unknown	Unknown	Not Provided	Not Provided
2.017	penA Type II NonMosaic	2018-03-01	Sweden		Unknown	Unknown	Not Provided	Not Provided
2.018	penA Type II NonMosaic	2018-03-01	Sweden		Unknown	Unknown	Not Provided	Not Provided
2.019	penA Type II NonMosaic	2008-07-04	Italy		Unknown	Unknown	Not Provided	Not Provided
2.02	penA Type II NonMosaic				Unknown	Unknown	Not Provided	Not Provided
2.021	penA Type II NonMosaic	2018-10-18	Sweden		Unknown	Unknown	Not Provided	Not Provided
2.022	penA Type II NonMosaic	2018-11-26	Sweden		Unknown	Unknown	Not Provided	Not Provided
2.023	penA Type II NonMosaic	2019-01-16	USA		Unknown	Unknown	Not Provided	Not Provided
2.024	penA Type II NonMosaic; A517G				Unknown	Unknown	Not Provided	Not Provided
2.025	penA Type II NonMosaic; A517G	2018-04-26	Canada		Unknown	Unknown	Not Provided	Not Provided
2.026	penA Type II NonMosaic; A517G	2019-01-15	Chile	30	Unknown	Unknown	Not Provided	Disc Diffusion									- Male patient MIC: - PEN: 4 - TET: 0.25 - CIP: 0.002 - CRO: 0.004 - AZM: 0.25 - SPT: 16 - IX: < 0.016 B-lactamase (+)
2.027	penA Type II NonMosaic; A517G	2019-01-06	Chile	3	Unknown	Unknown	Not Provided	Not Provided									Patient gender: Female B- Lactamase: Negative MIC E-Test P: 0.125 T: 0.25 CIP: 0.032 CRO: 0.002 AZM: 0.064 SPT: 8 IX: < 0.016
2.028	A517G		Canada		Unknown	Unknown	Not Provided	Not Provided
2.029	A517G		Canada		Unknown	Unknown	Not Provided	Not Provided
3.001	penA Type III NonMosaic; A517G	2008-01-21	Canada	36	Female	Negative	CMRNG/CipR	Agar Dilution
3.002	penA Type III NonMosaic; A517G	2018-10-31	Sweden		Unknown	Unknown	Not Provided	Not Provided
3.003	penA Type III NonMosaic; A517G	2019-01-18	Canada		Unknown	Unknown	Not Provided	Not Provided
4.001	penA Type IV NonMosaic	2002-07-18	Canada		Male	Negative	Not Provided	Agar Dilution									Penis/Urethra
5.001	penA Type V NonMosaic	2005-01-17	Canada	34	Male	Negative	EryR/CipR	Agar Dilution
5.002	penA Type V NonMosaic	2005-11-16	Canada	18	Male	Negative	CMRNG/CipR	Agar Dilution
5.003	penA Type V NonMosaic		Korea		Unknown	Unknown	Not Provided	Not Provided										NCCP11945
5.004	penA Type V NonMosaic	2010-11-19	Canada	43	Male	Negative	CipR	Agar Dilution
7.001	penA Type VII NonMosaic; A502V	1996-01-01	Asia		Unknown	Negative	CMRNG	Agar Dilution										WHO-L
9.001	penA Type IX NonMosaic	2001-06-01	Canada		Female	Negative	Not Provided	Agar Dilution									Cervix
9.002	penA Type IX NonMosaic	2017-11-02	Unknown		Unknown	Unknown	Not Provided	Not Provided
9.003	penA Type IX NonMosaic	2017-11-08	Unknown		Unknown	Unknown	Not Provided	Not Provided
9.004	penA Type IX NonMosaic	2017-11-08	Unknown		Unknown	Unknown	Not Provided	Not Provided
9.005	penA Type IX NonMosaic	2017-11-08	Unknown		Unknown	Unknown	Not Provided	Not Provided
9.006	penA Type IX NonMosaic	2017-11-08	Unknown		Unknown	Unknown	Not Provided	Not Provided
10.001	penA Type X Mosaic	2003-01-01	Japan		Unknown	Negative	CMRNG	Agar Dilution
10.002	penA Type X Mosaic	2017-11-03	Unknown		Unknown	Unknown	Not Provided	Not Provided
10.003	penA Type X Mosaic		Canada	26	Male	Unknown	CMRNG/CipR/CeDS	Agar Dilution									Urethra
10.004	penA Type X Mosaic; N513Y				Unknown	Unknown	Not Provided	Agar Dilution
10.005	penA Type X Mosaic; N513Y				Unknown	Unknown	Not Provided	Not Provided
10.006	penA Type X Mosaic; N513Y				Unknown	Unknown	Not Provided	Not Provided
11.001	penA Type XI NonMosaic; A502V	2017-11-02	Unknown		Unknown	Unknown	Not Provided	Not Provided
12.001	penA Type XII NonMosaic	1991-01-01	Canada		Unknown	Positive	PPNG	Agar Dilution										WHO-O
12.002	penA Type XII NonMosaic	2008-01-09	Canada	18	Female	Negative	CMRNG/CipR	Agar Dilution
12.003	penA Type XII NonMosaic	2012-12-10	Canada		Male	Negative	CMRNG/CipR	Agar Dilution	≥ 512.0								Rectum
12.004	penA Type XII NonMosaic	2006-06-15	Netherlands	37	Male	Unknown	Not Provided	Agar Dilution									Rectal
12.005	penA Type XII NonMosaic	2017-11-03	Unknown		Unknown	Unknown	Not Provided	Not Provided
12.006	penA Type XII NonMosaic	2017-11-08	Unknown		Unknown	Unknown	Not Provided	Not Provided
12.007	penA Type XII NonMosaic	2018-03-01	Sweden		Unknown	Unknown	Not Provided	Not Provided
12.008	penA Type XII NonMosaic	2016-03-16	China		Unknown	Unknown	Not Provided	Agar Dilution
13.001	penA Type XIII NonMosaic; A502V	1996-01-01	Canada		Male	Negative	CMRNG	Agar Dilution									Penis/Urethra
13.002	penA Type XIII NonMosaic; A502V	2018-10-17	Sweden		Unknown	Unknown	Not Provided	Not Provided
14.001	penA Type XIV NonMosaic	2013-12-31	Canada		Male	Negative	TRNG	Agar Dilution									Rectum
14.002	penA Type XIV NonMosaic	2014-07-30	Canada	32	Male	Negative	TetR/EryR	Agar Dilution									Penis/Urethra
14.003	penA Type XIV NonMosaic	2015-07-02	Canada		Unknown	Negative	EryR	Agar Dilution									Pharyngeal
14.004	penA Type XIV NonMosaic	2017-11-08	Unknown		Unknown	Unknown	Not Provided	Not Provided
14.005	penA Type XIV NonMosaic	2018-06-22	Australia		Unknown	Unknown	Not Provided	Not Provided
14.006	penA Type XIV NonMosaic	2018-06-22	Australia		Unknown	Unknown	Not Provided	Not Provided
14.007	penA Type XIV NonMosaic; A517G				Unknown	Unknown	Not Provided	Not Provided
14.008	penA Type XIV NonMosaic; A517G	2018-06-05	Canada		Unknown	Unknown	Not Provided	Not Provided
15.001	penA Type XV NonMosaic	1991-01-01	Canada		Unknown	Negative	Not Provided	Agar Dilution										WHO-F
15.002	penA Type XV NonMosaic	2012-01-01	Canada	36	Male	Negative	Not Provided	Agar Dilution									Penis/Urethra
15.003	penA Type XV NonMosaic	2017-11-06	Unknown		Unknown	Unknown	Not Provided	Not Provided
15.004	penA Type XV NonMosaic	2017-11-08	Unknown		Unknown	Unknown	Not Provided	Not Provided
15.005	penA Type XV NonMosaic	2018-10-04	Sweden		Unknown	Unknown	Not Provided	Not Provided
15.006	penA Type XV NonMosaic	2018-12-21	Sweden		Unknown	Unknown	Not Provided	Not Provided
15.007	penA Type XV NonMosaic	2019-03-11	Sweden		Unknown	Unknown	Not Provided	Not Provided
15.008	penA Type XV NonMosaic	2019-03-11	Sweden		Unknown	Unknown	Not Provided	Not Provided
16.001	penA Type XVI NonMosaic	2018-10-18	Sweden		Unknown	Unknown	Not Provided	Not Provided
17.001	penA Type XVII NonMosaic	1997-01-01	Canada		Male	Negative	CMRNG/CipR	Agar Dilution									Penis/Urethra
18.001	penA Type XVIII NonMosaic; A502T	2007-06-08	Canada		Male	Positive	CipR/EryR/PPNG/TRNG	Agar Dilution
19.001	penA Type XIX NonMosaic	1999-01-01	Canada		Male	Negative	TetR/EryR	Agar Dilution
19.002	penA Type XIX NonMosaic	2018-03-01	Sweden		Unknown	Unknown	Not Provided	Not Provided
19.003	penA Type XIX NonMosaic	2018-04-26	Sweden		Unknown	Unknown	Not Provided	Not Provided
19.004	penA Type XIX NonMosaic	2018-10-04	Sweden		Unknown	Unknown	Not Provided	Not Provided
19.005	penA Type XIX NonMosaic	2018-11-28	Sweden		Unknown	Unknown	Not Provided	Not Provided
19.006	penA Type XIX NonMosaic; A517G	2016-08-15	Canada		Unknown	Unknown	Not Provided	Not Provided
19.007	penA Type XIX; NonMosaic; A517G				Unknown	Unknown	Not Provided	Not Provided
19.008	penA Type XIX NonMosaic; A517G				Unknown	Unknown	Not Provided	Not Provided
21.001	penA Type XXI NonMosaic; A502V	2008-06-23	Canada	43	Female	Negative	CipR	Agar Dilution
21.002	penA Type XXI NonMosaic	2018-10-17	Sweden		Unknown	Unknown	Not Provided	Not Provided
22.001	penA Type XXII NonMosaic			19	Unknown	Unknown	Not Provided	Agar Dilution										ATCC49226
22.002	penA Type XXII NonMosaic	2010-01-01	Canada	25	Female	Negative	Not Provided	Agar Dilution
22.003	penA Type XXII NonMosaic	2010-10-15	Canada	4	Female	Negative	Not Provided	Agar Dilution
22.004	penA Type XXII NonMosaic	2011-04-26	Canada		Female	Negative	PenR/EryR	Agar Dilution									Cervix
22.005	penA Type XXII NonMosaic	2010-05-13	Canada	21	Female	Negative	EryR	Agar Dilution									Cervix
22.006	penA Type XXII NonMosaic	2015-10-15	Canada		Unknown	Negative	S	Agar Dilution									Urethra
22.007	penA Type XXII NonMosaic	2017-01-01			Unknown	Unknown	Not Provided	Not Provided
22.008	penA Type XXII NonMosaic	2017-10-26			Unknown	Unknown	Not Provided	Not Provided
22.009	penA Type XXII NonMosaic	2017-11-03	Unknown		Unknown	Unknown	Not Provided	Not Provided
22.01	penA Type XXII NonMosaic	2017-11-08	Unknown		Unknown	Unknown	Not Provided	Not Provided
22.011	penA Type XXII NonMosaic	2018-01-15	Sweden		Unknown	Unknown	Not Provided	Not Provided
22.012	penA Type XXII NonMosaic	2018-01-15	Sweden		Unknown	Unknown	Not Provided	Not Provided
22.013	penA Type XXII NonMosaic	2018-10-04	Sweden		Unknown	Unknown	Not Provided	Not Provided
27.001	penA Type XXVII Mosaic	2006-09-27	Canada		Male	Negative	CeDS/CipR/CxDS/PenR/TetR	Agar Dilution									Penis/Urethra
27.002	penA Type XXVII Mosaic	2018-10-29	Japan		Unknown	Unknown	Not Provided	Not Provided
34.001	penA Type XXXIV Mosaic	2005-11-24	Canada		Male	Negative	CipR	Agar Dilution
34.002	penA Type XXXIV Mosaic	2008-10-22	Canada	22	Male	Negative	CMRNG/CipR	Agar Dilution
34.003	penA Type XXXIV Mosaic	2006-01-01	Canada		Female	Negative	TetR/CipR	Agar Dilution
34.004	penA Type XXXIV Mosaic	2010-01-01	Canada	62	Male	Negative	CxDS/CMRNG/CipR	Agar Dilution
34.005	penA Type XXXIV Mosaic		Canada		Unknown	Unknown	Not Provided	Not Provided										GenBank No HQ204552.1, previously penA Type XXXVII
34.006	penA Type XXXIV Mosaic		Canada	29	Male	Negative	CipR	Agar Dilution									Rectal
34.007	penA Type XXXIV Mosaic	2015-01-01	Canada	45	Male	Unknown	Not Provided	Agar Dilution									Pharyngeal
34.008	penA Type XXXIV Mosaic	2017-10-26	Spain		Unknown	Unknown	Not Provided	Not Provided
34.009	penA Type XXXIV Mosaic	2017-11-03	Unknown		Unknown	Unknown	Not Provided	Not Provided
34.01	penA Type XXXIV Mosaic	2017-11-08	Unknown		Unknown	Unknown	Not Provided	Not Provided
34.011	penA Type XXXIV Mosaic	2018-01-18	Sweden		Unknown	Unknown	Not Provided	Not Provided
34.013	penA Type XXXIV Mosaic	2018-03-01			Unknown	Unknown	Not Provided	Not Provided
34.014	penA Type XXXIV Mosaic	2015-01-01	Argentina		Unknown	Unknown	Not Provided	Not Provided
34.015	penA Type XXXIV Mosaic	2018-10-09	Australia		Unknown	Unknown	Not Provided	Not Provided
34.016	penA Type XXXIV Mosaic; N513Y		Canada		Unknown	Unknown	Not Provided	Not Provided
34.017	penA Type XXXIV; Mosaic, N513Y	2017-11-25	China	31	Unknown	Unknown	Not Provided	Agar Dilution
35.001	penA Type XXXV Mosaic	2008-10-15	Canada	28	Male	Negative	CMRNG/CipR	Agar Dilution
35.002	penA Type XXXV Mosaic	2010-08-11	Canada	25	Male	Negative	CMRNG/CipR	Agar Dilution
35.003	penA Type XXXV Mosaic		Canada		Unknown	Unknown	Not Provided	Not Provided										GenBank No HQ204565.1, previously penA Type XXXVIII
37.001	penA Type 37 Mosaic; A311V	2011-01-01	Japan		Female	Unknown	Not Provided	E-Test									Pharynx	H041
38.001	penA Type 38 Mosaic	2015-01-21	Canada	21	Male	Negative	TRNG	Agar Dilution									rectal	39326
39.001	penA Type 39 SemiMosaic	2008-06-26	Canada	23	Female	Unknown	CipR	Agar Dilution										JF893455
40.001	penA Type 40 NonMosaic	2001-01-15	Canada	14	Female	Negative	Not Provided	Agar Dilution
41.001	penA Type 41 NonMosaic	2010-01-06	Canada	20	Female	Negative	CMRNG/CipR	Agar Dilution
41.002	penA Type 41 NonMosaic	2010-01-01	Canada	35	Female	Negative	CMRNG/CipR	Agar Dilution
42.001	penA Type 42 Mosaic; A502P	2012-01-01	France		Unknown	Negative	Not Provided	Agar Dilution										France F89
43.001	penA Type 43 NonMosaic; A502V	2012-01-01	Canada	64	Male	Negative	TRNG/CMRNG/CipR	Agar Dilution
43.002	penA Type 43 NonMosaic; A502V	2006-03-01	Canada		Male	Positive	CipR/CxDS/PPNG/TRNG	Agar Dilution									Penis/Urethra
43.003	penA Type 43 NonMosaic; A502V	2017-11-02	Unknown		Unknown	Unknown	Not Provided	Not Provided
43.004	penA Type 43 NonMosaic; A501V A517G				Unknown	Unknown	Not Provided	Agar Dilution
44.001	penA Type 44 NonMosaic; A502T	2014-01-04	Canada		Male	Negative	CipR	Agar Dilution									Rectum
44.002	penA Type 44 NonMosaic; A502T	2017-11-08	Unknown		Unknown	Unknown	Not Provided	Not Provided
44.003	penA Type 44 NonMosaic; A502T	2018-03-01	Sweden		Unknown	Unknown	Not Provided	Not Provided
45.001	penA Type 45 NonMosaic	2014-01-08	Canada		Male	Negative	Not Provided	Agar Dilution									Penis/Urethra
46.001	penA Type 46 NonMosaic	1989-01-01	Canada	34	Male	Negative	CxDS/CMRNG	Agar Dilution									Urethra
47.001	penA Type 47 SemiMosaic	2007-07-31	Canada	46	Male	Negative	TetR/EryR	Agar Dilution									Penis/Urethra
48.001	penA Type 48 NonMosaic	2010-01-06	Canada	23	Female	Negative	Not Provided	Agar Dilution
49.001	penA Type 49 NonMosaic; A502T	2014-01-01	Canada	20	Male	Negative	TetR/EryR/CipR	Agar Dilution									Pharynx
50.001	penA Type 50 NonMosaic	2008-10-23	Canada	35	Male	Negative	CMRNG/CipR	Agar Dilution
51.001	penA Type 51 Mosaic	2008-10-29	Canada	38	Male	Negative	CipR	Agar Dilution
52.001	penA Type 52 Mosaic	2010-01-01	Canada	38	Male	Negative	CMRNG/CipR	Agar Dilution
52.002	penA Type 52 Mosaic	2015-01-01	Argentina		Unknown	Unknown	Not Provided	Not Provided
53.001	penA Type 53 Mosaic	2011-01-01	Canada	28	Male	Negative	CeDS/CipR/CMRNG/CxDS	Agar Dilution
53.002	penA Type 53 Mosaic	2012-01-01	Canada	23	Male	Negative	CxDS/CMRNG/CipR	Agar Dilution
54.001	penA Type 54 NonMosaic; A502V	2011-01-01	Canada	62	Male	Negative	CMRNG/CipR	Agar Dilution
55.001	penA Type 55 Mosaic	2011-01-01	Canada	34	Male	Negative	CeDS/CipR/CMRNG/CxDS	Agar Dilution
56.001	penA Type 56 NonMosaic; A502V	2012-01-01	Canada	26	Male	Negative	CxDS/CMRNG/CipR	Agar Dilution
57.001	penA Type 57 NonMosaic; A502V	2012-01-01	Canada	18	Male	Negative	CMRNG/CipR	Agar Dilution
58.001	penA Type 58 Mosaic	2012-01-01	Canada	72	Male	Negative	CMRNG/CipR	Agar Dilution									Penis/Urethra
59.001	penA Type 59 Mosaic; A311V	2015-01-01	Japan		Male	Unknown	Not Provided	Agar Dilution									Penis/Urethra	GU140106
60.001	penA Type 60 Mosaic; A311V	2015-01-01	Japan	20	Male	Unknown	PPNG	E-Test									Isolated from urethra.	FC428, GenBank LC113953
61.001	penA Type 61 NonMosaic				Unknown	Unknown	Not Provided	Agar Dilution										D101E, CDC reference strain 193
62.001	penA Type 62 Mosaic	2016-10-06	USA		Unknown	Unknown	Not Provided	Not Provided
63.001	penA Type 63 Mosaic	2016-10-13	USA		Unknown	Unknown	Not Provided	Not Provided
64.001	penA Type 64 Mosaic; A311V	2010-01-01	France		Unknown	Unknown	Not Provided	Agar Dilution				> 32.0
65.001	penA Type 65 SemiMosaic		USA		Unknown	Unknown	Not Provided	Not Provided
66.001	penA Type 66 NonMosaic	2017-10-23	Spain		Unknown	Unknown	Not Provided	Not Provided
67.001	penA Type 67 Mosaic	2017-10-26			Unknown	Unknown	Not Provided	Not Provided
68.001	penA Type 68 NonMosaic	2017-11-03	Unknown		Unknown	Unknown	Not Provided	Not Provided
69.001	penA Type 69 NonMosaic	2017-11-03	Unknown		Unknown	Unknown	Not Provided	Not Provided
69.002	penA Type 69 NonMosaic	2017-11-08	Unknown		Unknown	Unknown	Not Provided	Not Provided
69.003	penA Type 69 NonMosaic	2018-03-01	Sweden		Unknown	Unknown	Not Provided	Not Provided
70.001	penA Type 70 NonMosaic	2017-11-06	Unknown		Unknown	Unknown	Not Provided	Not Provided
71.001	penA Type 71 Mosaic	2017-11-06	Unknown		Unknown	Unknown	Not Provided	Not Provided
72.001	penA Type 72 Mosaic	2017-11-06	Unknown		Unknown	Unknown	Not Provided	Not Provided
73.001	penA Type 73 SemiMosaic	2017-11-06	Unknown		Unknown	Unknown	Not Provided	Not Provided
74.001	penA Type 74 Mosaic	2017-11-06	Unknown		Unknown	Unknown	Not Provided	Not Provided
75.001	penA Type 75 Mosaic	2017-11-08	Unknown		Unknown	Unknown	Not Provided	Not Provided
76.001	penA Type 76 NonMosaic	2017-11-08	Unknown		Unknown	Unknown	Not Provided	Not Provided
76.002	penA Type 76 NonMosaic	2018-10-18	Sweden		Unknown	Unknown	Not Provided	Not Provided
77.001	penA Type 77 NonMosaic; A502T	2017-11-08	Unknown		Unknown	Unknown	Not Provided	Not Provided
78.001	penA Type 78 SemiMosaic	2017-11-08	Unknown		Unknown	Unknown	Not Provided	Not Provided
78.002	penA 78 SemiMosaic N513Y	2017-07-20	Canada	25	Male	Unknown	Probable-CMRNG/CipR	Agar Dilution									Rectal
79.001	penA Type 79 NonMosaic	2017-11-08	Unknown		Unknown	Unknown	Not Provided	Not Provided
79.002	penA Type 79 NonMosaic	2017-11-08	Unknown		Unknown	Unknown	Not Provided	Not Provided
80.001	penA Type 80 SemiMosaic	2017-11-08	Unknown		Unknown	Unknown	Not Provided	Not Provided
81.001	penA Type 81 SemiMosaic	2017-11-08	Unknown		Unknown	Unknown	Not Provided	Not Provided
82.001	penA Type 82 NonMosaic	2017-11-08	Unknown		Unknown	Unknown	Not Provided	Not Provided
83.001	penA Type 83 NonMosaic	2017-11-08	Unknown		Unknown	Unknown	Not Provided	Not Provided										T484S
84.001	penA Type 84 NonMosaic	2018-01-11	Sweden		Unknown	Unknown	Not Provided	Not Provided
85.001	penA Type 85 Mosaic; A502V	2018-01-19	Sweden		Unknown	Unknown	Not Provided	Not Provided
86.001	penA Type 86 NonMosaic	2018-01-19	Sweden		Unknown	Unknown	Not Provided	Not Provided
87.001	penA Type 87 NonMosaic; A502T	2018-01-19	Sweden		Unknown	Unknown	Not Provided	Not Provided
87.002	penA Type 87 NonMosaic; A501T A517G				Unknown	Unknown	Not Provided	Agar Dilution
88.001	penA Type 88 NonMosaic; A502V	2018-01-23	Sweden		Unknown	Unknown	Not Provided	Not Provided
89.001	penA Type 89 SemiMosaic	2018-03-01	Sweden		Unknown	Unknown	Not Provided	Not Provided
90.001	penA Type 90 NonMosaic	2018-03-01	Sweden		Unknown	Unknown	Not Provided	Not Provided
91.001	penA Type 91 SemiMosaic	2018-06-14	Canada		Unknown	Unknown	Not Provided	Not Provided
92.001	penA Type 92 Mosaic	2018-06-22	Australia		Unknown	Unknown	Not Provided	Not Provided
93.001	penA Type 93 SemiMosaic	2018-06-27	Australia		Unknown	Unknown	Not Provided	Not Provided
94.001	penA Type 94 NonMosaic	2018-09-18	Australia		Unknown	Unknown	Not Provided	Not Provided
95.001	penA Type 95 NonMosaic	2018-09-27	Sweden		Unknown	Unknown	Not Provided	Not Provided
96.001	penA Type 96 NonMosaic	2018-10-04	Sweden		Unknown	Unknown	Not Provided	Not Provided
97.001	penA Type 97 NonMosaic	2018-10-04	Sweden		Unknown	Unknown	Not Provided	Not Provided
98.001	penA Type 98 NonMosaic	2018-10-04	Sweden		Unknown	Unknown	Not Provided	Not Provided
98.002	penA Type 98 NonMosaic	2018-12-21	Sweden		Unknown	Unknown	Not Provided	Not Provided
99.001	penA Type 99 NonMosaic; A311V	2018-10-04	Sweden		Unknown	Unknown	Not Provided	Not Provided
100.001	penA WT NonMosaic	2001-01-25	Canada		Female	Negative	Not Provided	Agar Dilution									Cervix
100.002	penA WT NonMosaic	2017-11-06	Unknown		Unknown	Unknown	Not Provided	Not Provided
100.003	penA WT NonMosaic	2017-11-06	Unknown		Unknown	Unknown	Not Provided	Not Provided
100.004	penA WT NonMosaic	2017-11-06	Unknown		Unknown	Unknown	Not Provided	Not Provided
100.005	penA WT NonMosaic	2017-11-06	Unknown		Unknown	Unknown	Not Provided	Not Provided
100.006	penA WT NonMosaic	2017-11-06	Unknown		Unknown	Unknown	Not Provided	Not Provided
100.007	penA WT NonMosaic	2017-11-08	Unknown		Unknown	Unknown	Not Provided	Not Provided
100.008	penA WT NonMosaic	2017-11-08	Unknown		Unknown	Unknown	Not Provided	Not Provided
100.009	penA WT NonMosaic	2018-09-27	Sweden		Unknown	Unknown	Not Provided	Not Provided
100.01	penA WT NonMosaic	2018-10-04	Sweden		Unknown	Unknown	Not Provided	Not Provided
100.011	penA WT NonMosaic	2018-10-04	Sweden		Unknown	Unknown	Not Provided	Not Provided
100.012	penA WT NonMosaic	2018-10-04	Sweden		Unknown	Unknown	Not Provided	Not Provided
100.013	penA WT NonMosaic	2018-10-04	Sweden		Unknown	Unknown	Not Provided	Not Provided
100.014	penA WT NonMosaic	2018-12-21	Sweden		Unknown	Unknown	Not Provided	Not Provided
100.015	penA WT NonMosaic	2018-12-21	Sweden		Unknown	Unknown	Not Provided	Not Provided
101.001	penA Type 101 Mosaic; A502V	2018-10-09	Australia		Unknown	Unknown	Not Provided	Not Provided
102.001	penA Type 102 NonMosaic	2018-10-17	Sweden		Unknown	Unknown	Not Provided	Not Provided
103.001	penA Type 103 NonMosaic	2018-10-17	Sweden		Unknown	Unknown	Not Provided	Not Provided
103.002	penA Type 103 NonMosaic; A502V	2018-10-17	Sweden		Unknown	Unknown	Not Provided	Not Provided
103.003			China		Unknown	Unknown	Not Provided	Not Provided									WGS data available on PubMLST (NEIS1753 allele 1224)
104.001	penA Type 104 NonMosaic; A502T	2018-10-17	Sweden		Unknown	Unknown	Not Provided	Not Provided
105.001	penA Type 105 Mosaic	2018-10-18	Sweden		Unknown	Unknown	Not Provided	Not Provided
106.001	penA Type 106 NonMosaic			26	Male	Negative	Not Provided	Disc Diffusion	translation missing: en.metadata.disc_diffusion_values.Unknown	translation missing: en.metadata.disc_diffusion_values.Susceptible	translation missing: en.metadata.disc_diffusion_values.Susceptible	translation missing: en.metadata.disc_diffusion_values.Resistant	translation missing: en.metadata.disc_diffusion_values.Unknown	translation missing: en.metadata.disc_diffusion_values.Intermediate	translation missing: en.metadata.disc_diffusion_values.Susceptible	translation missing: en.metadata.disc_diffusion_values.Unknown
107.001	penA Type 107 NonMosaic; A502T	2016-12-12	Canada	35	Male	Unknown	Probable-CMRNG/CxDS/CipR	Agar Dilution									Rectal
108.001	penA Type 108 Mosaic	2018-10-29	Japan		Unknown	Unknown	Not Provided	Not Provided
109.001	penA Type 109 NonMosaic; A502V	2018-01-08	Canada	18	Female	Unknown	Probable-CMRNG/CxDS/CipR	Agar Dilution
110.001	penA Type 110 Mosaic	2018-11-26	Sweden		Unknown	Unknown	Not Provided	Not Provided
111.001	penA Type 111 Mosaic	2018-11-26	Sweden		Unknown	Unknown	Not Provided	Not Provided
112.001	penA Type 112 SemiMosaic	2018-11-26	Sweden		Unknown	Unknown	Not Provided	Not Provided
113.001	penA Type 113 SemiMosaic	2018-11-28	Sweden		Unknown	Unknown	Not Provided	Not Provided
114.001	penA Type 114 SemiMosaic	2018-11-28	Sweden		Unknown	Unknown	Not Provided	Not Provided
115.001	penA Type 115 Mosaic	2018-11-28	Sweden		Unknown	Unknown	Not Provided	Not Provided
116.001	penA Type 116 SemiMosaic	2018-11-28	Sweden		Unknown	Unknown	Not Provided	Not Provided
117.001	penA Type 117 Mosaic	2018-11-29	Sweden		Unknown	Unknown	Not Provided	Not Provided
118.001	penA Type 118 Mosaic	2017-05-26	Thailand	38	Female	Positive	CipR/PenR/PPNG/TetR	Agar Dilution
119.001	penA Type 119 NonMosaic	2019-03-11	Sweden		Unknown	Unknown	Not Provided	Not Provided
120.001	PenA Type 120 NonMosaic; A502V A517G	2017-07-21	Canada	58	Male	Unknown	CMRNG/CipR/AzR	Agar Dilution					≥ 64.0				Urethra
121.001	penA Type 121 Mosaic; A311V A517G	2019-06-04	China		Unknown	Unknown	Not Provided	Not Provided
121.002	A311V, A517G		Canada		Unknown	Unknown	Not Provided	Not Provided
122.001	PenA Type 122; A501V A517G	2008-01-21	Canada	36	Female	Unknown	CMRNG/CipR/AzR	Agar Dilution					≥ 128.0
123.001	penA Type 123 NonMosaic				Unknown	Unknown	Not Provided	Not Provided
124.001	penA Type 124 Mosaic; A311V N513Y				Unknown	Unknown	Not Provided	Not Provided
125.001	penA Type 125 NonMosaic; A501T A517G G543S				Unknown	Unknown	Not Provided	Agar Dilution
126.001	penA Type 126 NonMosaic; A501T A517G G543S				Unknown	Unknown	Not Provided	Agar Dilution
127.001	PenA Type 127 NonMosaic; N513Y	2017-06-18	United Kingdom		Unknown	Unknown	Not Provided	Not Provided
128.001	penA Type 128 SemiMosaic; A501V A517G	2019-06-19	China		Unknown	Unknown	Not Provided	Agar Dilution
129.001	penA Type 129 Mosaic; A517G	2019-01-11	Chile	39	Unknown	Unknown	Not Provided	Disc Diffusion									MIC -AZM: 0.5 - IX: 0.016 - CRO: 0.002 - CIP: 2 - TET: 16 - PEN: 64 B-lactamase (+)
130.001	penA Type 130 SemiMosaic; N513Y	2019-02-12	Chile	22	Unknown	Unknown	Not Provided	Not Provided									Gender: Male B-Lactamase: Positive MIC: P: 16 T: 0.5 CIP: 0.002 CRO: 0.008 AZM: 0.25 SPT: 16 IX: < 0.016
