# Supplementary material for: High precision Neisseria gonorrhoeae variant and antimicrobial resistance calling from metagenomic Nanopore sequencing
Source: HighWire-hosted journal article supplement (doi:10.1101/gr.262865.120), 2020-09-01
Supplement: Supplemental_Code.tar.zip [file ref_gene_muts.xlsx]

## Sheet: gene_pos
gene	start	end	strand	chrom	coding
penB	2049351	2050397	-1	R00000419	1
mtrR	1332867	1333499	1	R00000419	1
pilQ	103068	105263	-1	R00000419	1
ponA	108362	110758	1	R00000419	1
gyrA	1051396	1054146	1	R00000419	1
gyrB	2098152	2100542	-1	R00000419	1
parC	193663	195966	-1	R00000419	1
parE	1296483	1298468	-1	R00000419	1
norM_promoter	460253	460253	0	R00000419	0
rpsJ	2031311	2031622	1	R00000419	1
macAB_promoter	1415365	1415365	0	R00000419	0
23S	1263410	1266299	-1	R00000419	0
23S	1956488	1959377	1	R00000419	0
23S	1724797	1727686	-1	R00000419	0
23S	1620898	1623787	-1	R00000419	0

## Sheet: mutations
gene	abx	pos	ref	alt	type
penB	cro cfx	120	G	K	substitution
penB	cro cfx	121	A	D	substitution
mtrR	cro pen tet azt	45	G	D	substitution
mtrR	cro pen tet azt	39	A	T	substitution
pilQ	cro cfx pen tet	666	E	K	substitution
ponA	cro cfx pen	421	L	P	substitution
gyrA	cip	91	S	F	substitution
gyrA	cip	95	D	N	substitution
gyrA	cip	95	D	G	substitution
rpsJ	tet	57	V	M	substitution
23S	azt	2045	A	G	SNP
23S	azt	2597	C	T	SNP
