# Supplementary figures and images for: High precision Neisseria gonorrhoeae variant and antimicrobial resistance calling from metagenomic Nanopore sequencing
Source: HighWire-hosted journal article supplement (doi:10.1101/gr.262865.120), 2020-09-01

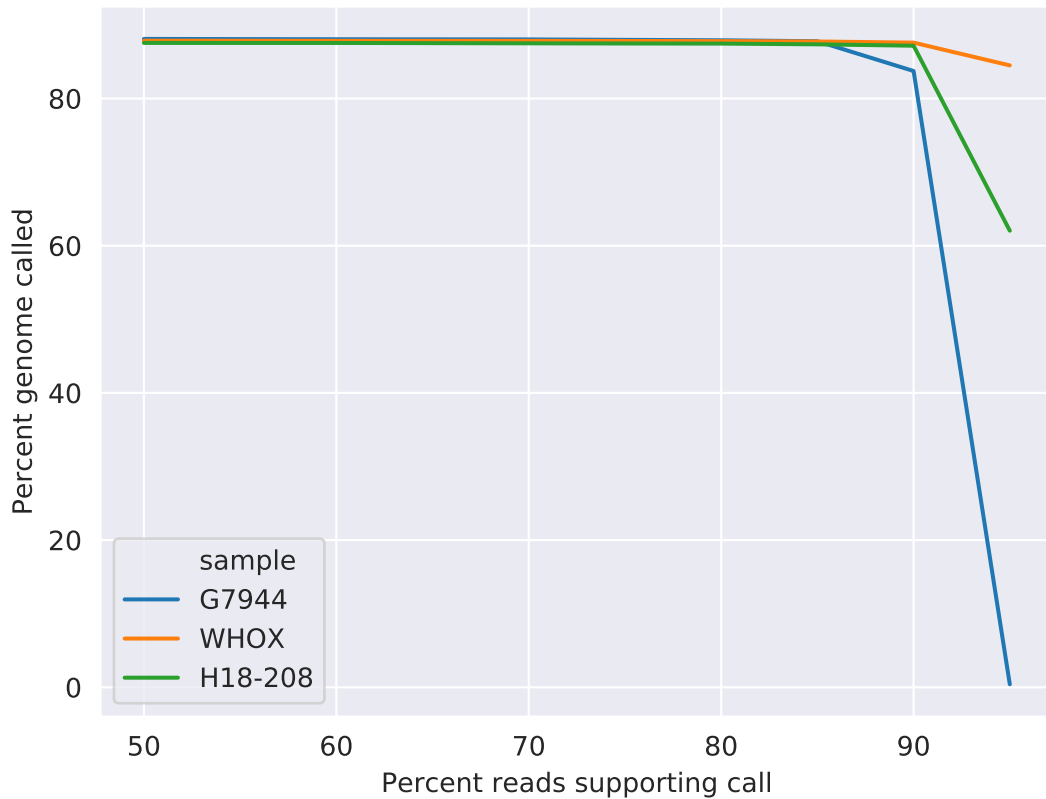

Supplement: Supplemental_Code.tar.zip [file Coverage_over_supporting_reads.pdf › ngonpipe-master/threshold_analysis/images/Coverage_over_supporting_reads.pdf]

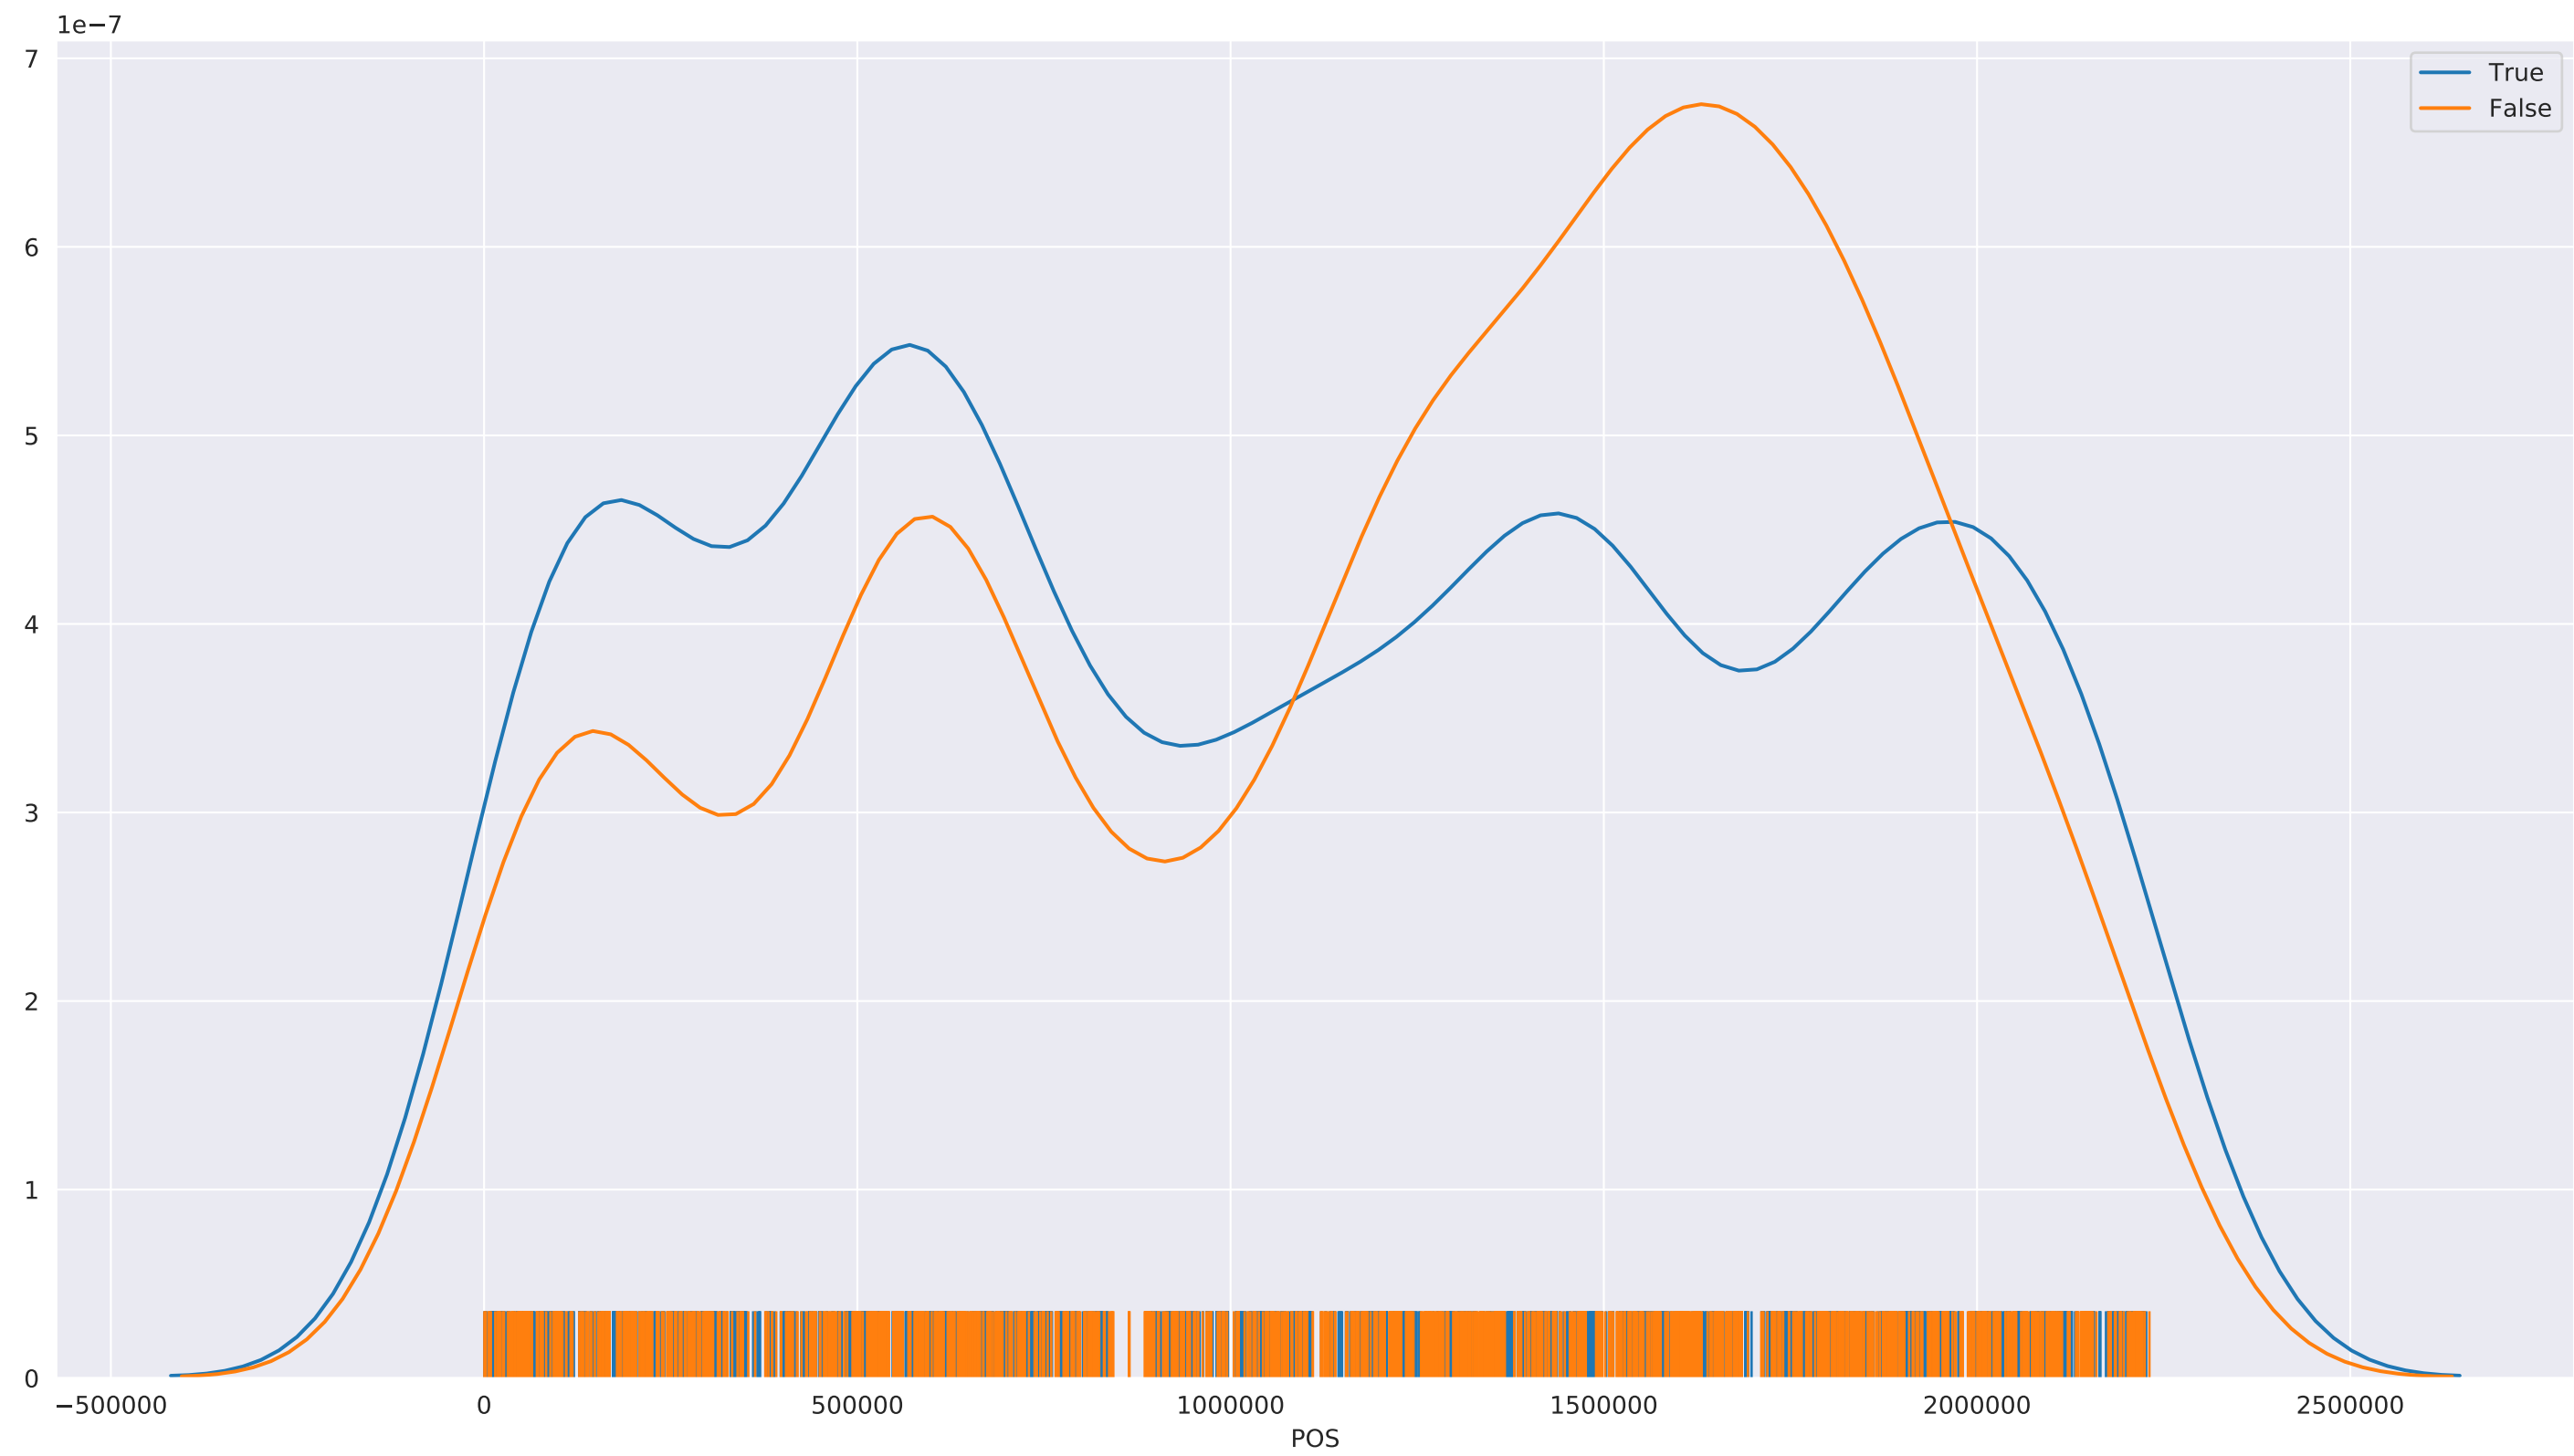

Supplement: Supplemental_Code.tar.zip [file SNP_locations.pdf › ngonpipe-master/threshold_analysis/images/SNP_locations.pdf]

SNP validation = False

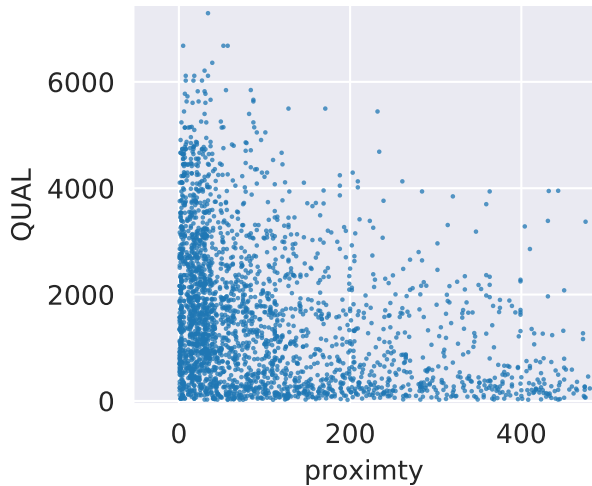

SNP validation = True

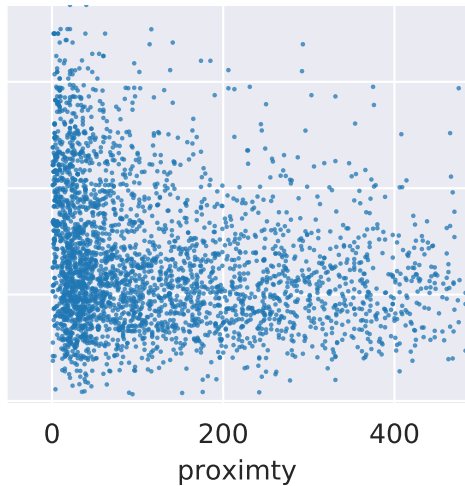

Supplement: Supplemental_Code.tar.zip [file SNP_relative_proximity.pdf › ngonpipe-master/threshold_analysis/images/SNP_relative_proximity.pdf]

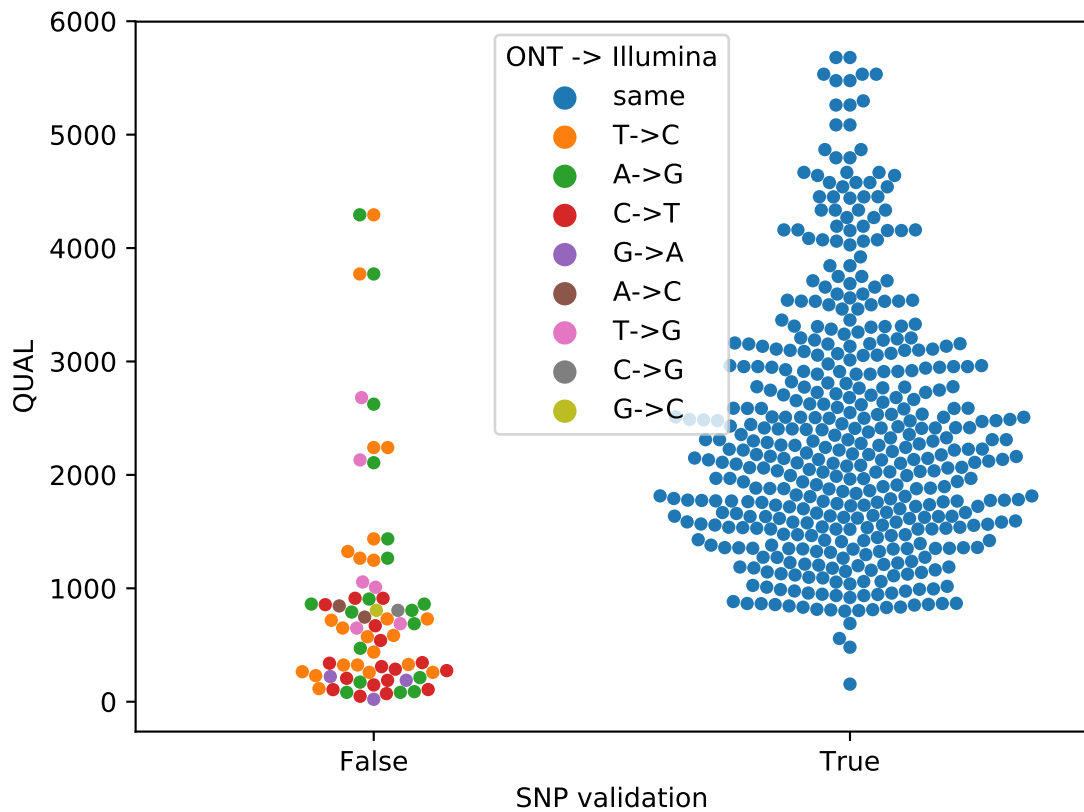

Supplement: Supplemental_Code.tar.zip [file SNP_validated_qualts.pdf › ngonpipe-master/threshold_analysis/images/SNP_validated_qualts.pdf]

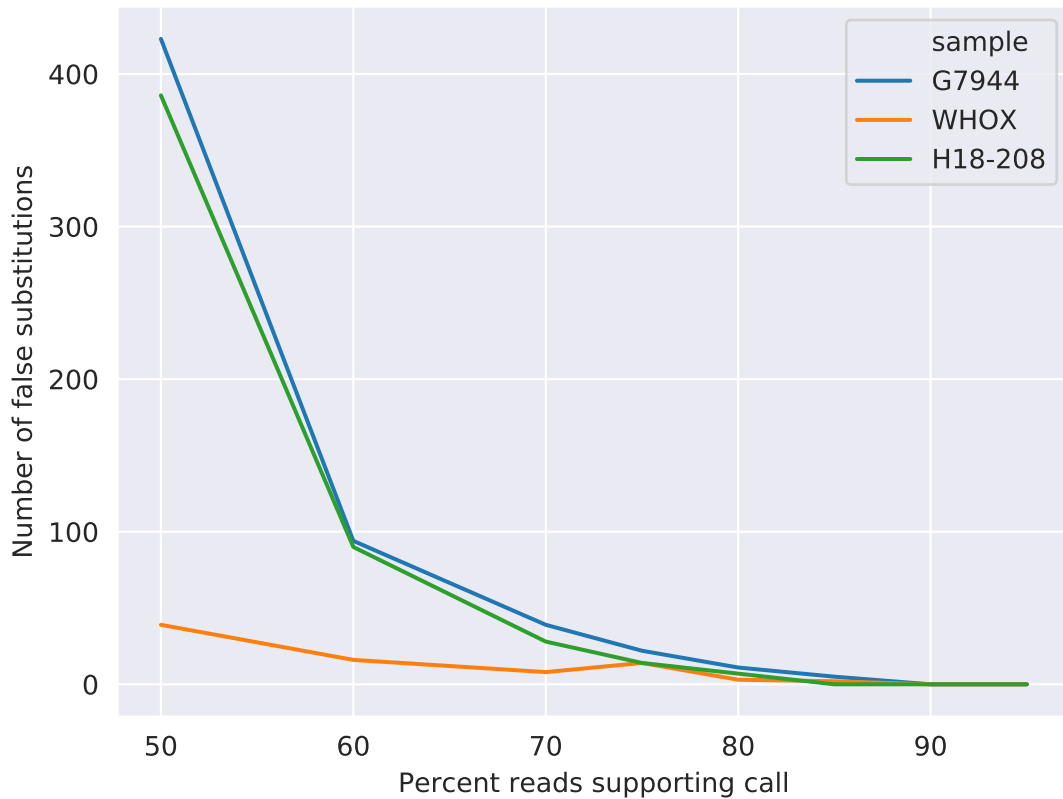

Supplement: Supplemental_Code.tar.zip [file SNPs_over_supporting_reads.pdf › ngonpipe-master/threshold_analysis/images/SNPs_over_supporting_reads.pdf]

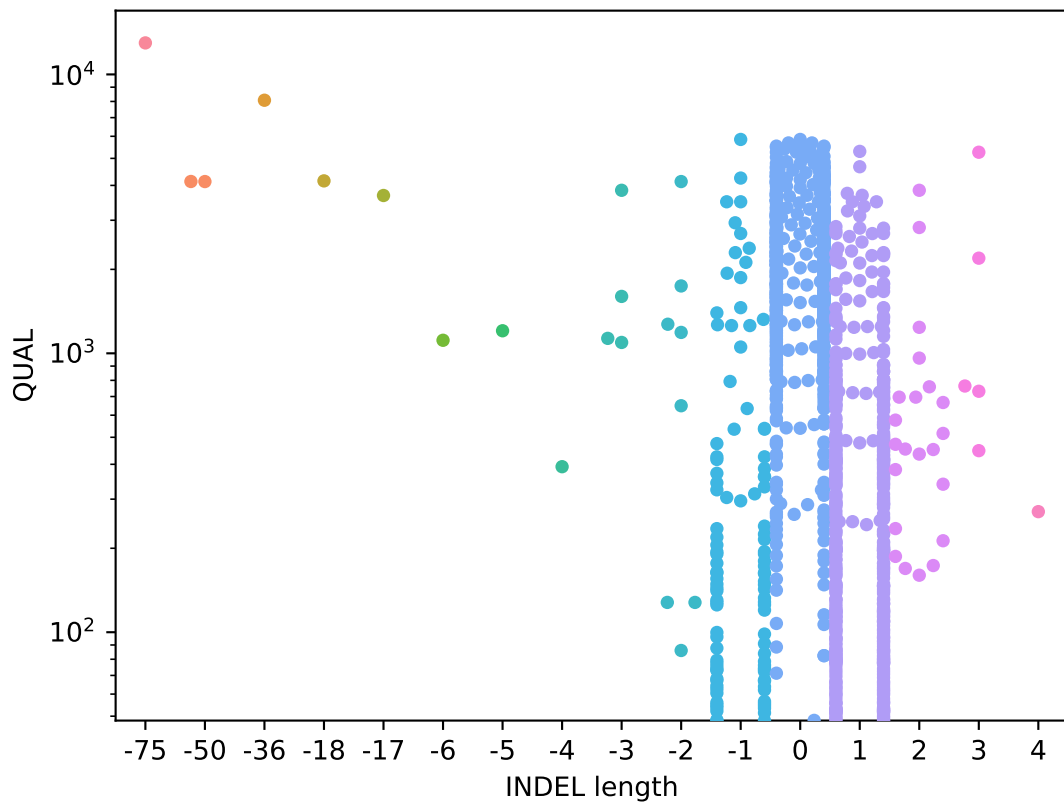

Supplement: Supplemental_Code.tar.zip [file indel_lengths_qual.pdf › ngonpipe-master/threshold_analysis/images/indel_lengths_qual.pdf]
